# Supplementary material for: Muscle function during single leg landing
Source: PubMed Central journal article supplement (PMC9262956; doi:10.1038/s41598-022-15024-w), 2022-07-07
Supplement: 41598_2022_15024_MOESM1_ESM.pdf [file 41598_2022_15024_MOESM1_ESM.pdf]

## Supplementary material

The following document contains supplementary data for the validation of our simulations for the following manuscript:

Muscle function during single leg landing

Authors

Nirav Maniar<sup>1,2</sup>, Anthony G Schache<sup>3</sup>, Claudio Pizzolato<sup>4,5</sup>, David A Opar<sup>1,2</sup>

<sup>1</sup>School of Behavioural and Health, Australian Catholic University, Fitzroy, Victoria, Australia

<sup>2</sup>Sports Performance, Recovery, Injury and New Technologies (SPRINT) Research Centre, Australian Catholic University, Fitzroy, Victoria, Australia

<sup>3</sup>La Trobe Sport and Exercise Medicine Research Centre, La Trobe University, Bundoora, Victoria, Australia

<sup>4</sup>Griffith Centre of Biomedical and Rehabilitation Engineering, Menzies Health Institute Queensland, Griffith University, Gold Coast, Queensland, Australia

<sup>5</sup>School of Health Sciences and Social Work, Griffith University, Gold Coast, Queensland, Australia.

The data below includes the comparison of simulated and experimental joint moments, comparison of simulated and experimental excitations, comparison of simulated and experimental ground reaction forces, comparison of joint reaction forces computed via simulated and experimental ground reaction forces, and a table outlining the synthesis methods of muscle force estimation.

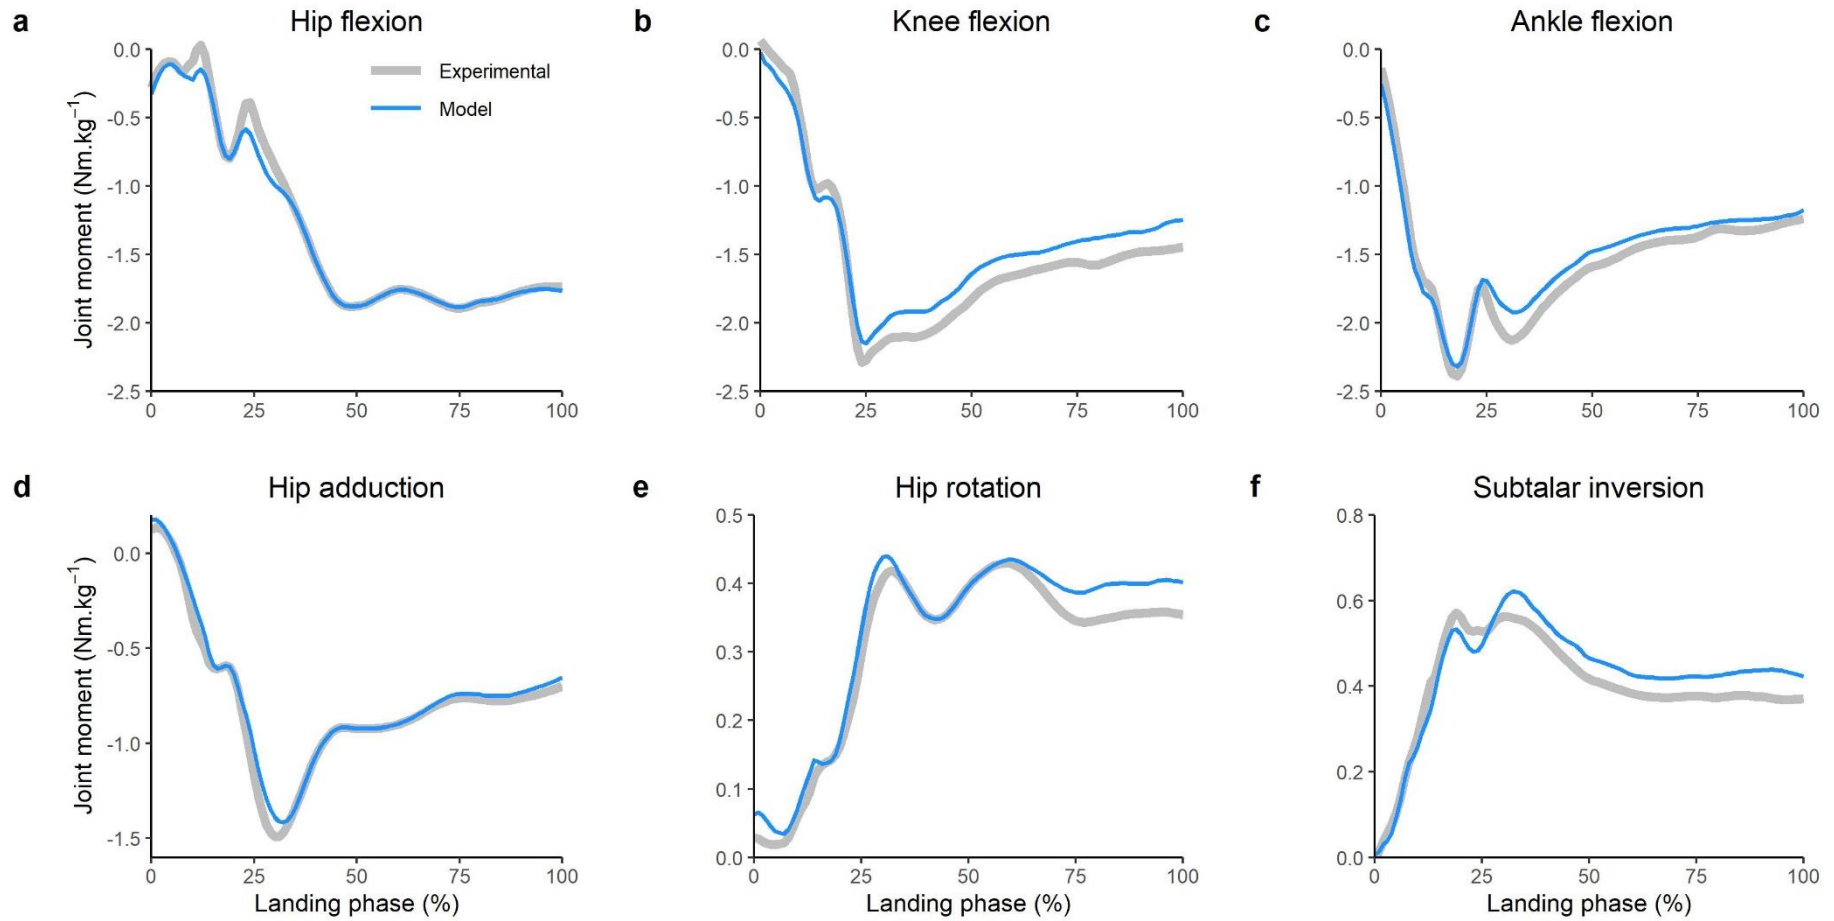

32 Supplementary Figure S1. Comparison of model (blue) and experimental (grey, from inverse dynamics) body mass normalised joint moments  
 33 for the landing phase (initial contact to peak knee flexion) of a single-leg drop landing task from a 0.31m height. Positive values are indicated by  
 34 the title of each subplot.

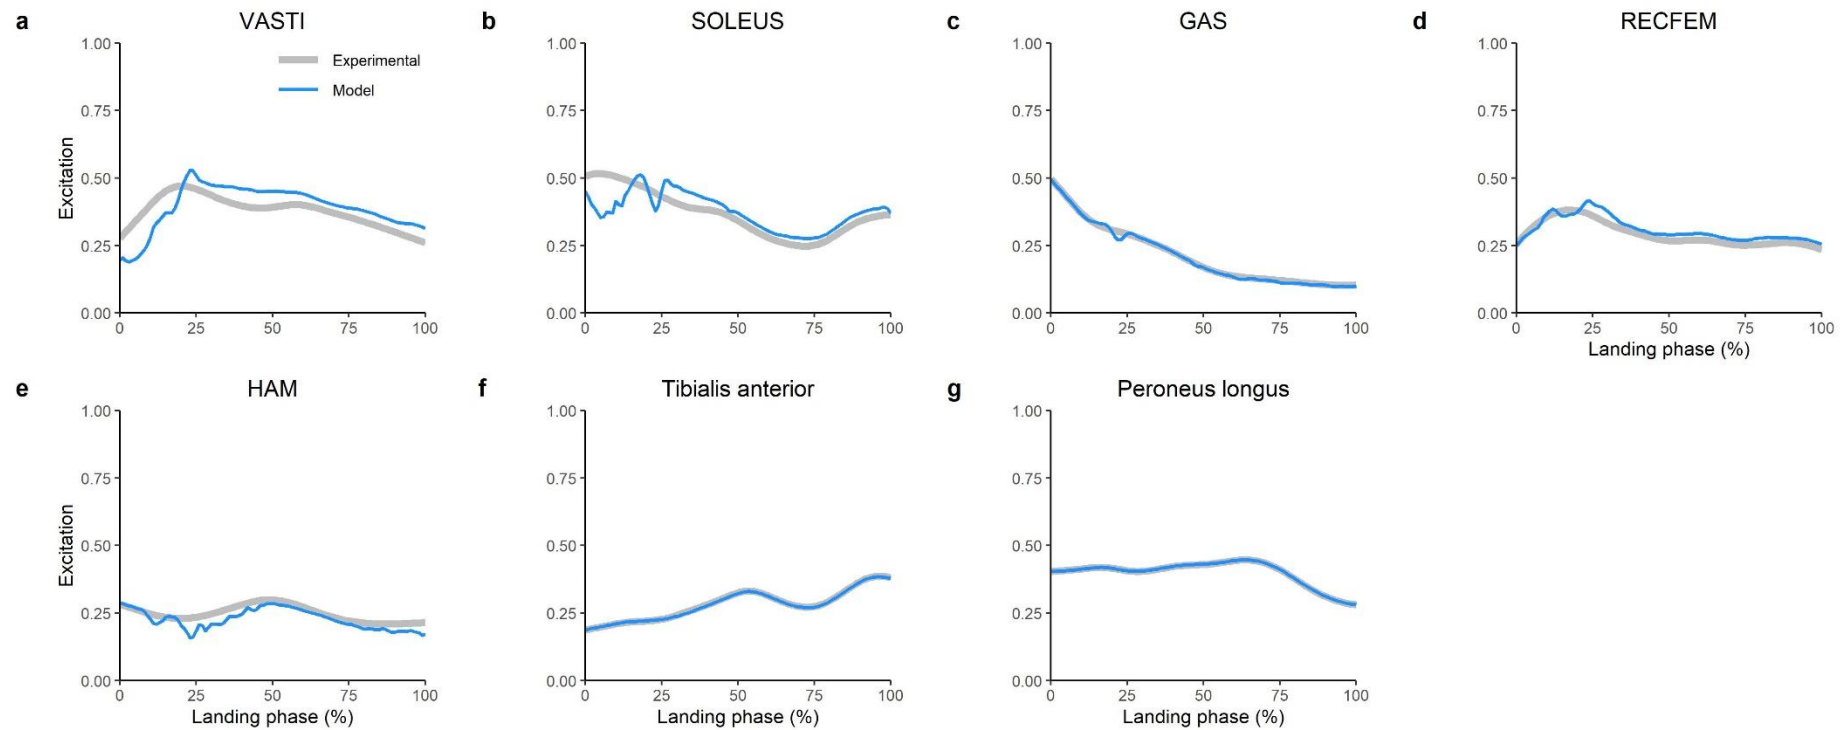

35

36 Supplementary Figure S2. Comparison of model (blue) and experimental (grey, from surface electromyography) excitations for the landing  
 37 phase (initial contact to peak knee flexion) of a single-leg drop landing task from a 0.31m height. VASTI, average of vastus lateralis and  
 38 medialis signals, SOLEUS, soleus, GAS, average of lateral and medial gastrocnemius signals, RECFEM, rectus femoris, HAM, average of  
 39 medial and lateral hamstring signals.

40

41

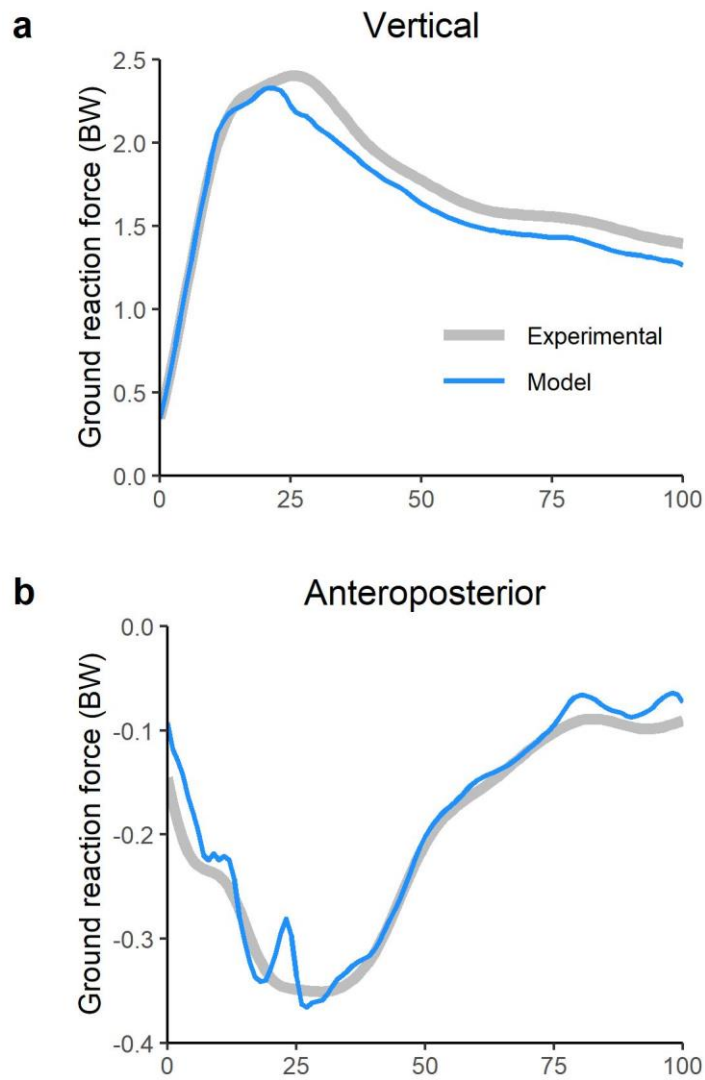

43

44 Supplementary Figure S3. Comparison of model (blue, from “rolling on ground” constraint)  
 45 and experimental (grey, from force plate) bodyweight (BW) normalised ground reaction  
 46 forces for the landing phase (initial contact to peak knee flexion) of a single-leg drop landing  
 47 task from a 0.31m height. Positive values indicate superior (panel a) and anterior (panel b)  
 48 directed ground reaction forces.

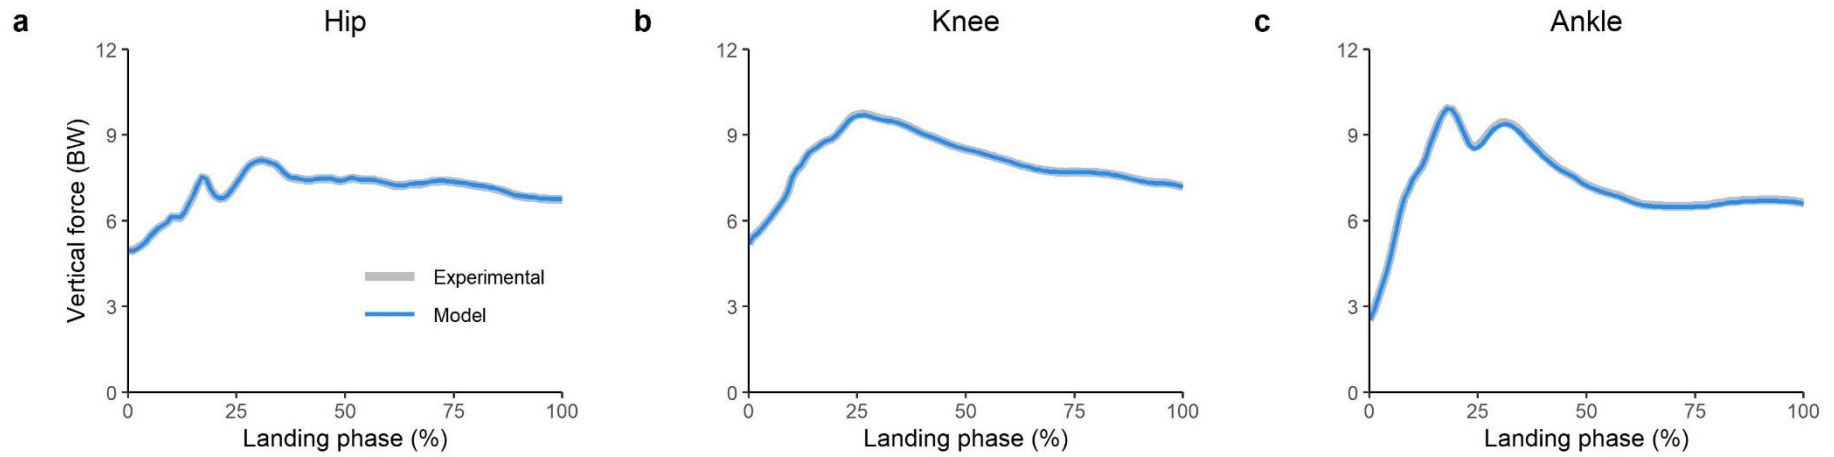

50

51 Supplementary Figure S4. Comparison of model (blue, from “rolling on ground” constraint derived ground reaction forces) and experimental  
 52 (grey, from force plate derived ground reaction forces) bodyweight (BW) normalised joint contact force for the landing phase (initial contact to  
 53 peak knee flexion) of a single-leg drop landing task from a 0.31m height. Positive values represent a compressive force.

54

55

56

57

58

59

60

61 Supplementary Table 1. Mapping of lower-limb muscles, corresponding model actuators and excitation inputs.

| Abbreviation | Muscle group              | Muscles                   | Model actuator | Excitation input            |
|--------------|---------------------------|---------------------------|----------------|-----------------------------|
| ADDLONG      | Adductor longus/brevis    | Adductor brevis           | addbrev        | Synthesised                 |
|              |                           | Adductor longus           | addlong        | Synthesised                 |
| ADDMAG       | Adductor magnus           | Adductor magnus           | addmagDist     | Synthesised                 |
|              |                           |                           | addmagIsch     | Synthesised                 |
|              |                           |                           | addmagMid      | Synthesised                 |
|              |                           |                           | addmagProx     | Synthesised                 |
| BFSH         | Biceps femoris short head | Biceps femoris short head | bfsh           | Synthesised                 |
| DORSI        | Dorsiflexors              | Extensor digitorum longus | edl            | Synthesised                 |
|              |                           | Extensor hallucis longus  | ehl            | Synthesised                 |
|              |                           | Tibialis anterior         | tibant         | EMG (Tibialis anterior)     |
| GAS          | Gastrocnemius             | Lateral gastrocnemius     | gaslat         | EMG (Lateral gastrocnemius) |
|              |                           | Medial gastrocnemius      | gasmed         | EMG (Medial gastrocnemius)  |
| GMAX         | Gluteus maximus           | Gluteus maximus           | glmax1         | Synthesised                 |
|              |                           |                           | glmax2         | Synthesised                 |

---

|       |                          |                          |         |                         |
|-------|--------------------------|--------------------------|---------|-------------------------|
|       |                          |                          | glmax3  | Synthesised             |
| GMED  | Gluteus medius/minimus   | Gluteus medius           | glmed1  | Synthesised             |
|       |                          |                          | glmed2  | Synthesised             |
|       |                          |                          | glmed3  | Synthesised             |
|       |                          | Gluteus minimus          | glmin1  | Synthesised             |
|       |                          |                          | glmin2  | Synthesised             |
|       |                          |                          | glmin3  | Synthesised             |
| HAM   | Biarticular hamstrings   | Biceps femoris long head | bflh    | EMG (Lateral hamstring) |
|       |                          | Semimembranosus          | semimem | EMG (Medial hamstring)  |
|       |                          | Semitendinosus           | semiten | EMG (Medial hamstring)  |
| ILPSO | Iliopsoas                | Iliacus                  | iliacus | Synthesised             |
|       |                          | Psoas major              | psoas   | Synthesised             |
| PER   | Peroneals                | Peroneus brevis          | perbrev | EMG (Peroneus longus)   |
|       |                          | Peroneus longus          | perlong | EMG (Peroneus longus)   |
| PFINV | Plantar-flexor-invertors | Flexor digitorum longus  | fdl     | Synthesised             |
|       |                          | Flexor hallucis longus   | fhl     | Synthesised             |

---

---

|        |                |                    |         |                        |
|--------|----------------|--------------------|---------|------------------------|
|        |                | Tibialis posterior | tibpost | Synthesised            |
| PIRI   | Piriformis     | Piriformis         | piri    | Synthesised            |
| RECFEM | Rectus femoris | Rectus femoris     | recfem  | EMG (Rectus femoris)   |
| SOLEUS | Soleus         | Soleus             | soleus  | EMG (Soleus)           |
| VASTI  | Vasti          | Vastus intermedius | vasint  | EMG (Vastus lateralis) |
|        |                | Vastus lateralis   | vaslat  | EMG (Vastus lateralis) |
|        |                | Vastus medialis    | vasmed  | EMG (Vastus medialis)  |

---

62 EMG, excitations were derived from collected surface electromyography data; Synthesised, excitations were derived from a static optimisation  
63 algorithm.
